# Supplementary material
Source: MDPI journal article supplement (https://www.mdpi.com/2311-5629/10/2/38)
Supplement: s1 [file s1]

## Supplemental material

### Observation of structural changes during oxidation of black and brown soot using Raman spectroscopy

Kim Cuong Le\*, Saga Bergqvist, Jonatan Henriksson, Per-Erik Bengtsson

Division of Combustion Physics, Department of Physics, Lund University, P. O. Box 118,  
SE-221 00 Lund, Sweden

\* Email: [thi\\_kim\\_cuong.le@fysik.lu.se](mailto:thi_kim_cuong.le@fysik.lu.se)

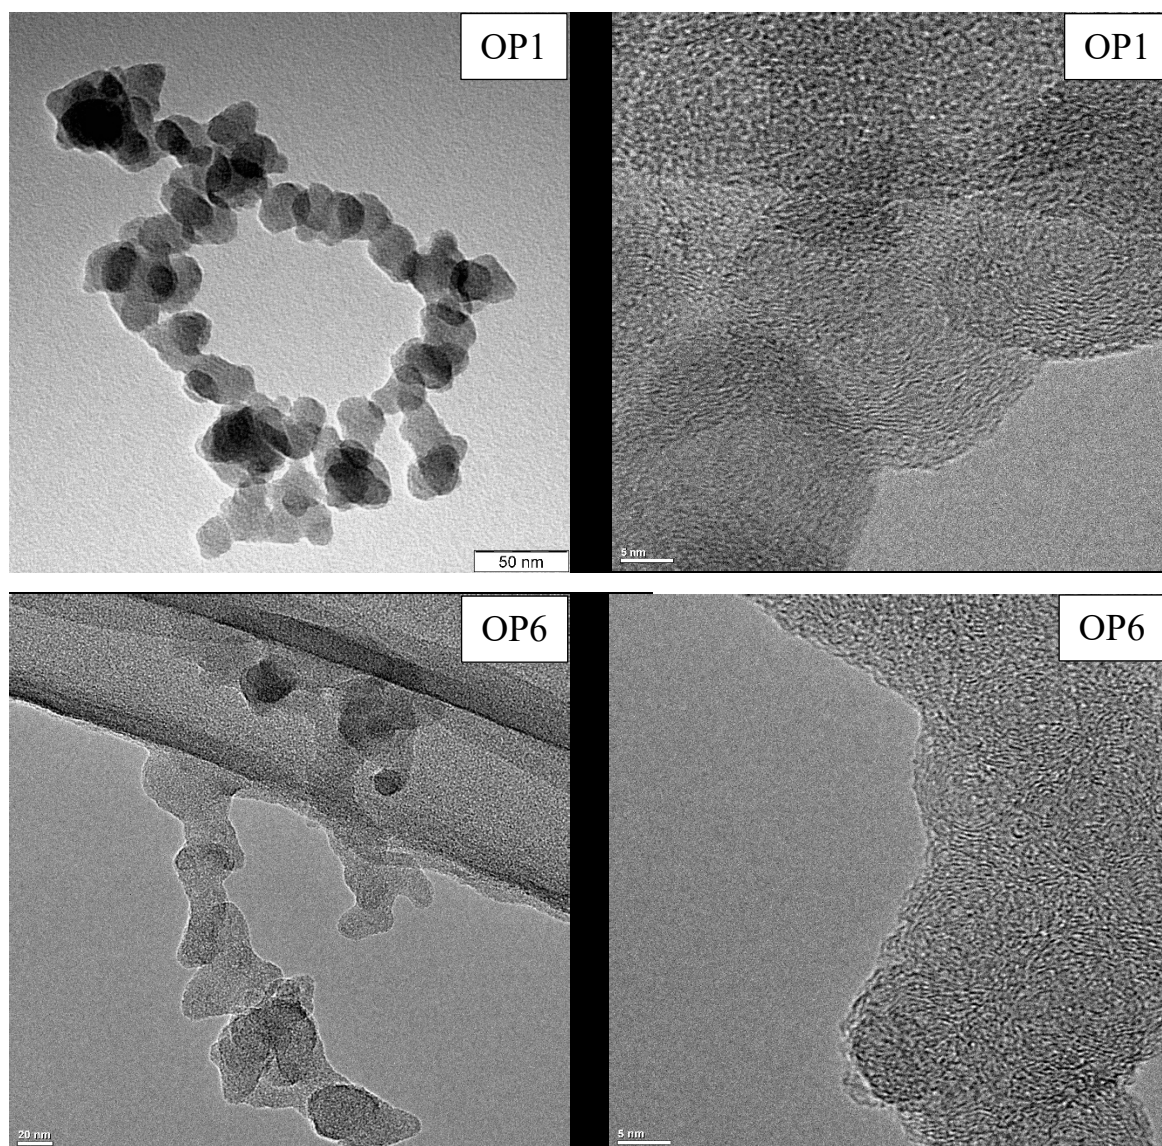

**Figure S1:** High resolution transmission electron microscopy images of OP1 soot and OP6 soot

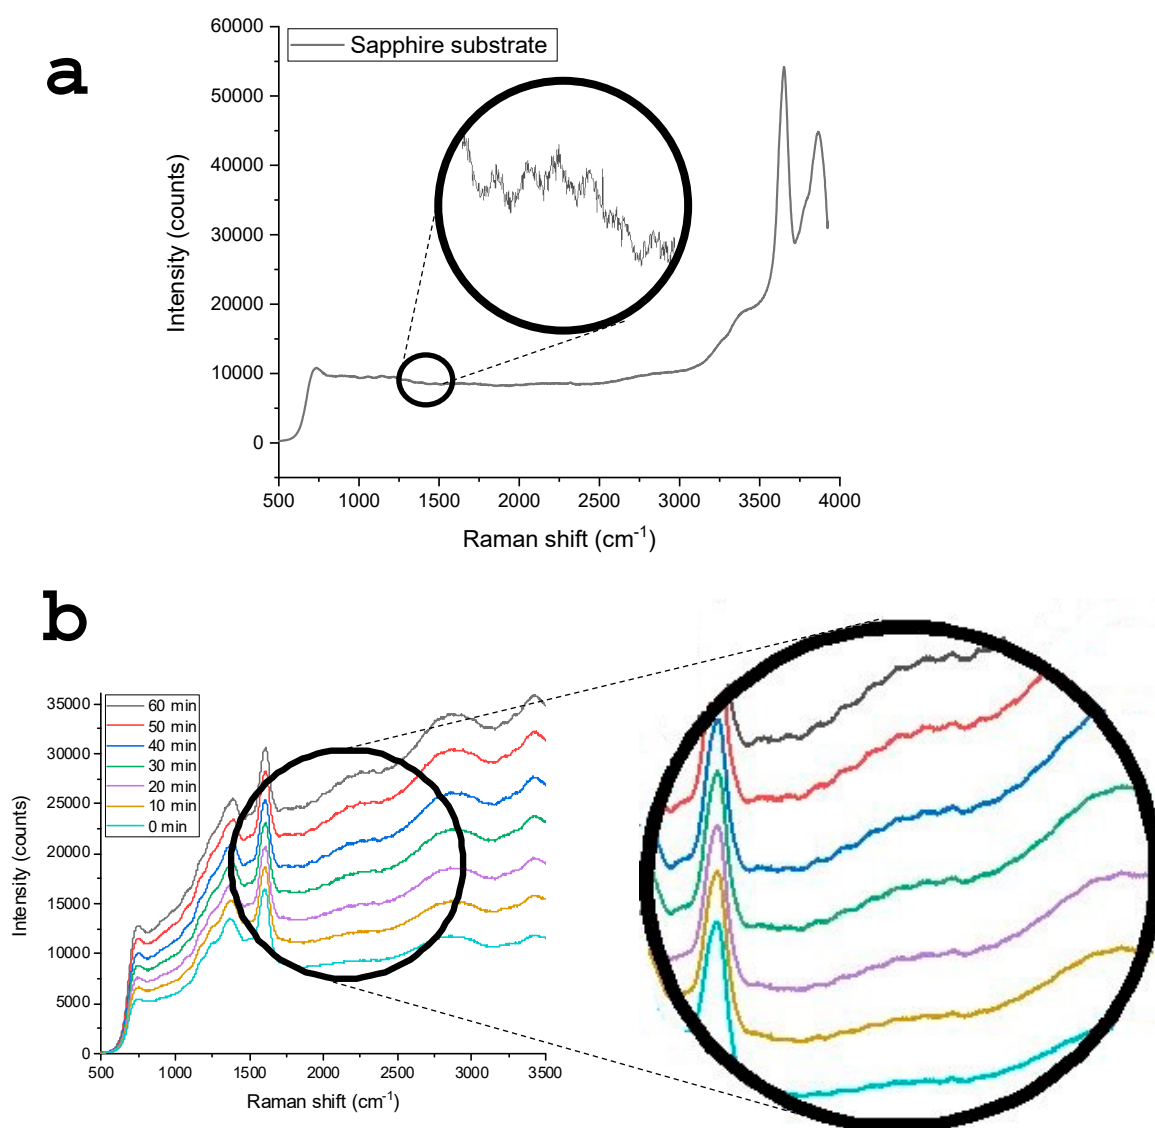

**Figure S2:** Fringes appear in spectrum of the clean sapphire substrate (a) and in those of OP6 soot exposed to laser radiation at different time length (b)

**Note 1:** Subtracting photoluminescence signal from the soot spectra

In Fig. S2, we observe interference between the incident light and the scattered light on the substrate, resulting in a sinusoidal function in the spectra of both the clean substrate and OP6 soot. The amplitude of this function increases with the background intensity, as depicted in Fig. S2b. Consequently, using a straight line or second polynomial function alone cannot effectively subtract this interference. As a consequence of this interference, we are unable to clearly observe variations in the D<sub>3</sub> band and may misinterpret an increase of oxygenated groups and shoulder peaks of the D and G bands. Fig. S3 presents a comparison of three different background subtraction methods: the straight line, the second polynomial function, and the signal from organic compounds.



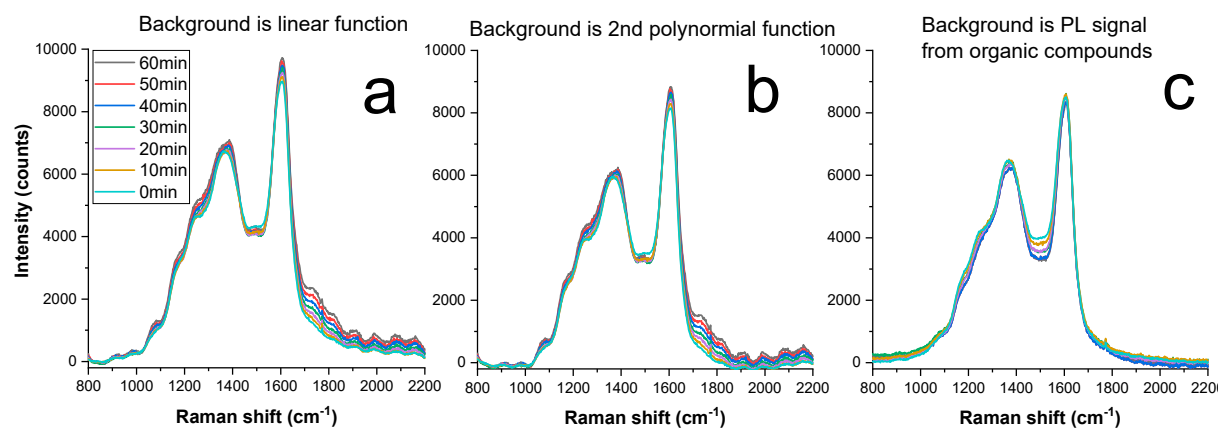

**Figure S3:** Comparing Raman spectra of OP6 soot exposed to laser irradiation after subtracting background as a straight line (a), a 2<sup>nd</sup> polynomial curve (b), and the signal from organic compounds (c).

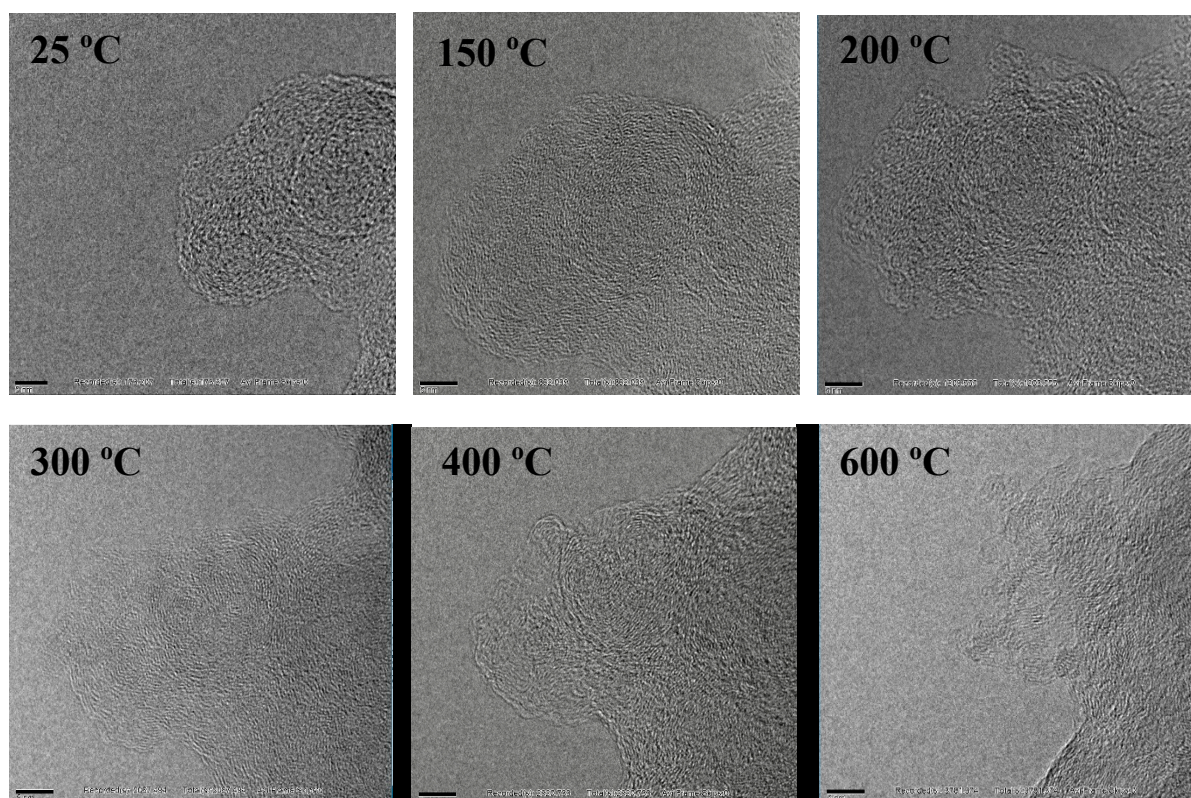

**Figure S4:** The structural evolution of OP1 soot observed via high resolution transmission electron microscopy
